# Supplementary material for: The Sexually Antagonistic Genes of Drosophila melanogaster
Source: PLoS Biol. 2010 Mar 16;8(3):e1000335. doi: 10.1371/journal.pbio.1000335 (PMC2838750; doi:10.1371/journal.pbio.1000335)
Supplement: Table S4 — Gene Ontology categories enriched for genes associated with female fitness. Subsets of fitness-related transcripts showing tissue-specific expression were tested for overrepresentation of GO terms in each tissue. (0.06 MB XLS) [file pbio.1000335.s007.xls]

## Sheet: Virgin spermatheca
	GOBPID	Pvalue	OddsRatio	ExpCount	Count	Size	Term
1	GO:0042684	0.003399646	27.735849	0.089008766	2	12	cardioblast cell fate commitment
2	GO:0009309	0.004125068	10.298780	0.326365475	3	44	amine biosynthetic process
3	GO:0006952	0.005611833	4.806667	1.149696561	5	155	defense response
4	GO:0035050	0.006064838	19.800539	0.118678355	2	16	embryonic heart tube development
5	GO:0009069	0.006840952	18.477987	0.126095752	2	17	serine family amino acid metabolic process
6	GO:0001764	0.007417397	Inf	0.007417397	1	1	neuron migration
7	GO:0019432	0.007417397	Inf	0.007417397	1	1	triglyceride biosynthetic process
8	GO:0019544	0.007417397	Inf	0.007417397	1	1	arginine catabolic process to glutamate
9	GO:0044262	0.009895481	5.169340	0.845583277	4	114	cellular carbohydrate metabolic process

## Sheet: Mated spermatheca
	GOBPID	Pvalue	OddsRatio	ExpCount	Count	Size	Term
1	GO:0042684	0.002187228	35.05238	0.071207013	2	12	cardioblast cell fate commitment
2	GO:0035050	0.003917291	25.02381	0.094942684	2	16	embryonic heart tube development
3	GO:0001764	0.005933918	Inf	0.005933918	1	1	neuron migration
4	GO:0019432	0.005933918	Inf	0.005933918	1	1	triglyceride biosynthetic process
5	GO:0019544	0.005933918	Inf	0.005933918	1	1	arginine catabolic process to glutamate
6	GO:0035051	0.007372539	17.50238	0.130546190	2	22	cardiac cell differentiation
7	GO:0009064	0.008742844	15.90693	0.142414026	2	24	glutamine family amino acid metabolic process

## Sheet: Crop
	GOBPID	Pvalue	OddsRatio	ExpCount	Count	Size	Term
1	GO:0019362	0.00001972884	80.945055	0.056641942	3	10	pyridine nucleotide metabolic process
2	GO:0006766	0.00024147656	29.773279	0.124612272	3	22	vitamin metabolic process
3	GO:0016052	0.00062202935	11.653907	0.396493594	4	70	carbohydrate catabolic process
4	GO:0006098	0.00064605385	73.680000	0.039649359	2	7	pentose-phosphate shunt
5	GO:0006739	0.00064605385	73.680000	0.039649359	2	7	NADP metabolic process
6	GO:0016199	0.00136954583	46.031250	0.056641942	2	10	axon midline choice point recognition
7	GO:0006006	0.00325171560	11.266154	0.300202293	3	53	glucose metabolic process
8	GO:0002092	0.00566419420	Inf	0.005664194	1	1	positive regulation of receptor internalization
9	GO:0048252	0.00566419420	Inf	0.005664194	1	1	lauric acid metabolic process
10	GO:0048259	0.00566419420	Inf	0.005664194	1	1	regulation of receptor-mediated endocytosis
11	GO:0005996	0.00924356537	7.587318	0.436142953	3	77	monosaccharide metabolic process

## Sheet: Midgut
	GOBPID	Pvalue	OddsRatio	ExpCount	Count	Size	Term
1	GO:0055059	0.0008400949	18.97843	0.189885367	3	22	asymmetric neuroblast division
2	GO:0048103	0.0019093436	13.85561	0.250303439	3	29	somatic stem cell division
3	GO:0006721	0.0038363436	26.31541	0.094942684	2	11	terpenoid metabolic process
4	GO:0007405	0.0038656897	10.58390	0.319352664	3	37	neuroblast proliferation
5	GO:0045167	0.0053804768	21.52493	0.112204990	2	13	asymmetric protein localization during cell fate commitment
6	GO:0007258	0.0086311531	Inf	0.008631153	1	1	JUN phosphorylation
7	GO:0007489	0.0086311531	Inf	0.008631153	1	1	maintenance of imaginal histoblast diploidy
8	GO:0035313	0.0086311531	Inf	0.008631153	1	1	wound healing, spreading of epidermal cells

## Sheet: Hindgut
	GOBPID	Pvalue	OddsRatio	ExpCount	Count	Size	Term
1	GO:0006098	0.001067964	56.584615	0.050977748	2	7	pentose-phosphate shunt
2	GO:0006739	0.001067964	56.584615	0.050977748	2	7	NADP metabolic process
3	GO:0016052	0.001614206	8.842424	0.509777478	4	70	carbohydrate catabolic process
4	GO:0012501	0.001746482	5.224564	1.296291301	6	178	programmed cell death
5	GO:0016265	0.002010524	5.073446	1.332703978	6	183	death
6	GO:0019362	0.002256631	35.350962	0.072825354	2	10	pyridine nucleotide metabolic process
7	GO:0048190	0.004174456	10.250700	0.327714093	3	45	wing disc dorsal/ventral pattern formation
8	GO:0006006	0.006615235	8.601176	0.385974376	3	53	glucose metabolic process
9	GO:0002092	0.007282535	Inf	0.007282535	1	1	positive regulation of receptor internalization
10	GO:0035120	0.007282535	Inf	0.007282535	1	1	post-embryonic appendage morphogenesis
11	GO:0048252	0.007282535	Inf	0.007282535	1	1	lauric acid metabolic process
12	GO:0048259	0.007282535	Inf	0.007282535	1	1	regulation of receptor-mediated endocytosis
13	GO:0008632	0.008223008	16.615385	0.138368173	2	19	apoptotic program
14	GO:0048731	0.008983754	2.256386	7.916115981	15	1087	system development

## Sheet: Thoracic ganglion
	GOBPID	Pvalue	OddsRatio	ExpCount	Count	Size	Term
1	GO:0048731	0.0000000003232899	5.754316	8.649089683	29	1087	system development
2	GO:0065007	0.0000000006081351	5.296966	17.926770061	41	2253	biological regulation
3	GO:0032502	0.0000000006371378	5.225467	13.049224545	35	1640	developmental process
4	GO:0032501	0.0000000133794510	4.531337	14.529197572	35	1826	multicellular organismal process
5	GO:0051674	0.0000006359596984	7.379346	2.052865813	12	258	localization of cell
6	GO:0007411	0.0000041424181694	10.145658	0.954821308	8	120	axon guidance
7	GO:0050794	0.0000418248225346	4.051061	6.238985933	17	1009	regulation of cellular process
8	GO:0019219	0.0000440101050611	3.679502	5.935805799	17	746	regulation of nucleobase, nucleoside, nucleotide and nucleic acid metabolic process
9	GO:0032990	0.0000463816785681	5.547736	2.156304788	10	271	cell part morphogenesis
10	GO:0048812	0.0000463816785681	5.547736	2.156304788	10	271	neurite morphogenesis
11	GO:0000904	0.0000731448873755	5.235138	2.275657451	10	286	cell morphogenesis involved in differentiation
12	GO:0007165	0.0000787421364045	3.294256	7.527174646	19	946	signal transduction
13	GO:0010556	0.0001197559649428	3.477578	5.784625759	16	727	regulation of macromolecule biosynthetic process
14	GO:0010468	0.0001343774290319	3.326352	6.484828051	17	815	regulation of gene expression
15	GO:0022008	0.0001366861521492	4.153431	3.485097775	12	438	neurogenesis
16	GO:0035290	0.0001636773842985	35.771104	0.111395819	3	14	trunk segmentation
17	GO:0009880	0.0001682211785826	8.347324	0.833897387	6	112	embryonic pattern specification
18	GO:0031326	0.0001927667492355	3.321721	6.023331086	16	757	regulation of cellular biosynthetic process
19	GO:0007365	0.0001963090062084	16.138843	0.294403237	4	37	periodic partitioning
20	GO:0035289	0.0002034408989630	32.785714	0.119352664	3	15	posterior head segmentation
21	GO:0048666	0.0002054369847150	4.576888	2.578017532	10	324	neuron development
22	GO:0008037	0.0002668569960732	14.787879	0.318273769	4	40	cell recognition
23	GO:0006355	0.0003237581756977	3.560034	4.408091706	13	554	regulation of transcription, DNA-dependent
24	GO:0030030	0.0003256567879920	4.304100	2.729197572	10	343	cell projection organization
25	GO:0009887	0.0003683349994535	3.933179	3.310047202	11	416	organ morphogenesis
26	GO:0019222	0.0003805253190279	2.935546	7.757923129	18	975	regulation of metabolic process
27	GO:0007400	0.0009718266235187	17.858766	0.198921106	3	25	neuroblast fate determination
28	GO:0032774	0.0011191207200307	3.081258	5.020768712	13	631	RNA biosynthetic process
29	GO:0007444	0.0011483641884584	3.906667	2.649629130	9	333	imaginal disc development
30	GO:0030154	0.0012414015336964	2.829416	6.413216453	15	806	cell differentiation
31	GO:0014016	0.0013609708108764	15.709286	0.222791639	3	28	neuroblast differentiation
32	GO:0048865	0.0015094643905243	15.103022	0.230748483	3	29	stem cell fate commitment
33	GO:0007419	0.0016677482319547	14.541667	0.238705327	3	30	ventral cord development
34	GO:0035239	0.0019079247389993	8.419048	0.533108564	4	67	tube morphogenesis
35	GO:0016192	0.0019386092648888	3.603086	2.856507080	9	359	vesicle-mediated transport
36	GO:0048749	0.0020727353564360	4.346067	1.814160486	7	228	compound eye development
37	GO:0007414	0.0026884819691166	32.228070	0.079568442	2	10	axonal defasciculation
38	GO:0016199	0.0026884819691166	32.228070	0.079568442	2	10	axon midline choice point recognition
39	GO:0007423	0.0027154539078041	3.715226	2.434794336	8	306	sensory organ development
40	GO:0016481	0.0028344405687561	5.679535	0.978691841	5	123	negative regulation of transcription
41	GO:0043405	0.0032691519795306	28.643275	0.087525287	2	11	regulation of MAP kinase activity
42	GO:0007380	0.0039029716477049	25.775439	0.095482131	2	12	specification of segmental identity, head
43	GO:0007431	0.0043655181416821	5.106729	1.082130816	5	136	salivary gland development
44	GO:0046529	0.0045890874900404	23.429027	0.103438975	2	13	imaginal disc fusion, thorax closure
45	GO:0006350	0.0056415459411733	2.735432	4.665386725	11	630	transcription
46	GO:0035282	0.0060013570292317	6.019992	0.732718894	4	102	segmentation
47	GO:0007167	0.0060616126968954	4.703965	1.169656102	5	147	enzyme linked receptor protein signaling pathway
48	GO:0048870	0.0060616126968954	4.703965	1.169656102	5	147	cell motility
49	GO:0007379	0.0065221839668071	19.044156	0.123193300	2	16	segment specification
50	GO:0009890	0.0073566070892218	4.478623	1.225354012	5	154	negative regulation of biosynthetic process
51	GO:0048598	0.0075562298361678	4.448148	1.233310856	5	155	embryonic morphogenesis
52	GO:0009888	0.0075731401153846	3.796439	1.742548887	6	219	tissue development
53	GO:0000122	0.0076016911682542	8.156250	0.405799056	3	51	negative regulation of transcription from RNA polymerase II promoter
54	GO:0001764	0.0079568442346591	Inf	0.007956844	1	1	neuron migration
55	GO:0002092	0.0079568442346591	Inf	0.007956844	1	1	positive regulation of receptor internalization
56	GO:0007258	0.0079568442346591	Inf	0.007956844	1	1	JUN phosphorylation
57	GO:0007388	0.0079568442346591	Inf	0.007956844	1	1	posterior compartment specification
58	GO:0035018	0.0079568442346591	Inf	0.007956844	1	1	adult chitin-based cuticle pattern formation
59	GO:0035313	0.0079568442346591	Inf	0.007956844	1	1	wound healing, spreading of epidermal cells
60	GO:0048259	0.0079568442346591	Inf	0.007956844	1	1	regulation of receptor-mediated endocytosis
61	GO:0043284	0.0084202380756134	2.161987	9.365205664	17	1177	biopolymer biosynthetic process
62	GO:0008595	0.0084558381183419	7.827857	0.421712744	3	53	determination of anterior/posterior axis, embryo

## Sheet: Fatbody
	GOBPID	Pvalue	OddsRatio	ExpCount	Count	Size	Term
1	GO:0016063	0.000405300	106.724638	0.032366824	2	5	rhodopsin biosynthetic process
2	GO:0019752	0.001411455	4.723356	1.708968307	7	264	carboxylic acid metabolic process
3	GO:0009410	0.001435130	45.714286	0.058260283	2	9	response to xenobiotic stimulus
4	GO:0017143	0.001435130	45.714286	0.058260283	2	9	insecticide metabolic process
5	GO:0009309	0.002799145	11.912195	0.284828051	3	44	amine biosynthetic process
6	GO:0006090	0.003058495	29.075099	0.084153742	2	13	pyruvate metabolic process
7	GO:0006952	0.003104355	5.594574	1.003371544	5	155	defense response
8	GO:0009069	0.005245523	21.310145	0.110047202	2	17	serine family amino acid metabolic process
9	GO:0019748	0.005831309	9.028395	0.368981794	3	57	secondary metabolic process
10	GO:0044262	0.006127662	5.997521	0.737963587	4	114	cellular carbohydrate metabolic process
11	GO:0001764	0.006473365	Inf	0.006473365	1	1	neuron migration
12	GO:0002084	0.006473365	Inf	0.006473365	1	1	protein depalmitoylation
13	GO:0019432	0.006473365	Inf	0.006473365	1	1	triglyceride biosynthetic process
14	GO:0019544	0.006473365	Inf	0.006473365	1	1	arginine catabolic process to glutamate
15	GO:0048252	0.006473365	Inf	0.006473365	1	1	lauric acid metabolic process
16	GO:0044255	0.008179204	4.392289	1.262306136	5	195	cellular lipid metabolic process
17	GO:0006519	0.008529489	4.345325	1.275252866	5	197	cellular amino acid and derivative metabolic process
18	GO:0009636	0.008728208	15.971739	0.142414026	2	22	response to toxin

## Sheet: Heart
	GOBPID	Pvalue	OddsRatio	ExpCount	Count	Size	Term
1	GO:0006952	0.00003096836	7.543694	1.254214430	8	155	defense response
2	GO:0045167	0.00013600353	38.657895	0.105192178	3	13	asymmetric protein localization during cell fate commitment
3	GO:0016063	0.00063391293	84.505747	0.040458530	2	5	rhodopsin biosynthetic process
4	GO:0035051	0.00069532176	20.321330	0.178017532	3	22	cardiac cell differentiation
5	GO:0045176	0.00223496112	36.197044	0.072825354	2	9	apical protein localization
6	GO:0042684	0.00403392848	25.327586	0.097100472	2	12	cardioblast cell fate commitment
7	GO:0035050	0.00718355117	18.081281	0.129467296	2	16	embryonic heart tube development
8	GO:0001764	0.00809170600	Inf	0.008091706	1	1	neuron migration
9	GO:0002084	0.00809170600	Inf	0.008091706	1	1	protein depalmitoylation
10	GO:0019544	0.00809170600	Inf	0.008091706	1	1	arginine catabolic process to glutamate
11	GO:0048732	0.00923459644	4.222874	1.294672960	5	160	gland development
12	GO:0006915	0.00976129305	5.182143	0.841537424	4	104	apoptosis
13	GO:0042440	0.00980606394	7.391700	0.445043830	3	55	pigment metabolic process

## Sheet: Head
	GOBPID	Pvalue	OddsRatio	ExpCount	Count	Size	Term
1	GO:0009410	0.00009337665	48.223684	0.09588672	3	9	response to xenobiotic stimulus
2	GO:0017143	0.00009337665	48.223684	0.09588672	3	9	insecticide metabolic process
3	GO:0006952	0.00032790122	7.270981	0.93852013	6	92	defense response
4	GO:0050896	0.00039596442	2.682620	8.98138908	20	843	response to stimulus
5	GO:0016063	0.00109777013	63.489177	0.05327040	2	5	rhodopsin biosynthetic process
6	GO:0009636	0.00154921817	15.201524	0.23438975	3	22	response to toxin
7	GO:0007379	0.00314776326	11.543684	0.29831423	3	28	segment specification
8	GO:0042742	0.00441686417	6.578079	0.67120701	4	63	defense response to bacterium
9	GO:0016199	0.00477192150	23.792208	0.10654080	2	10	axon midline choice point recognition
10	GO:0006721	0.00579221168	21.145743	0.11719488	2	11	terpenoid metabolic process
11	GO:0030198	0.00579221168	21.145743	0.11719488	2	11	extracellular matrix organization
12	GO:0043405	0.00579221168	21.145743	0.11719488	2	11	regulation of MAP kinase activity
13	GO:0051674	0.00594262736	3.193690	2.74875253	8	258	localization of cell
14	GO:0009253	0.00690285900	19.028571	0.12784895	2	12	peptidoglycan catabolic process
15	GO:0009416	0.00781344926	5.536000	0.78840189	4	74	response to light stimulus
16	GO:0046529	0.00810187202	17.296340	0.13850303	2	13	imaginal disc fusion, thorax closure
17	GO:0007602	0.00866377733	7.786984	0.42616318	3	40	phototransduction
18	GO:0008038	0.00866377733	7.786984	0.42616318	3	40	neuron recognition
19	GO:0007411	0.00887724677	4.242656	1.27848955	5	120	axon guidance
20	GO:0014070	0.00938729053	15.852814	0.14915711	2	14	response to organic cyclic substance
21	GO:0043279	0.00938729053	15.852814	0.14915711	2	14	response to alkaloid

## Sheet: Eyes
	GOBPID	Pvalue	OddsRatio	ExpCount	Count	Size	Term
1	GO:0016063	0.0004577464	100.149660	0.03438975	2	5	rhodopsin biosynthetic process
2	GO:0006952	0.0006271523	6.456376	1.06608227	6	155	defense response
3	GO:0007379	0.0008896121	18.347500	0.19258260	3	28	segment specification
4	GO:0050789	0.0011384276	2.487448	14.29238031	25	2078	regulation of biological process
5	GO:0009416	0.0016023733	8.868085	0.50896831	4	74	response to light stimulus
6	GO:0016199	0.0020149728	37.530612	0.06877950	2	10	axon midline choice point recognition
7	GO:0043405	0.0024519316	33.356009	0.07565745	2	11	regulation of MAP kinase activity
8	GO:0007602	0.0025317127	12.376689	0.27511800	3	40	phototransduction
9	GO:0008038	0.0025317127	12.376689	0.27511800	3	40	neuron recognition
10	GO:0050962	0.0033288389	11.163110	0.30262980	3	44	detection of light stimulus involved in sensory perception
11	GO:0009584	0.0035494519	10.895833	0.30950775	3	45	detection of visible light
12	GO:0009582	0.0047859598	9.730053	0.34389751	3	50	detection of abiotic stimulus
13	GO:0007601	0.0053446892	9.330357	0.35765341	3	52	visual perception
14	GO:0009581	0.0059411587	8.962010	0.37140931	3	54	detection of external stimulus
15	GO:0002092	0.0068779501	Inf	0.00687795	1	1	positive regulation of receptor internalization
16	GO:0007258	0.0068779501	Inf	0.00687795	1	1	JUN phosphorylation
17	GO:0007624	0.0068779501	Inf	0.00687795	1	1	ultradian rhythm
18	GO:0035018	0.0068779501	Inf	0.00687795	1	1	adult chitin-based cuticle pattern formation
19	GO:0035313	0.0068779501	Inf	0.00687795	1	1	wound healing, spreading of epidermal cells
20	GO:0048259	0.0068779501	Inf	0.00687795	1	1	regulation of receptor-mediated endocytosis
21	GO:0051674	0.0081111361	3.762963	1.77451113	6	258	localization of cell
22	GO:0007411	0.0090759936	5.317682	0.82535401	4	120	axon guidance
23	GO:0007165	0.0099072607	2.358070	6.50654080	13	946	signal transduction

[truncated: 2 more sheets: Carcass, Salivary gland]
